# Supplementary material
Source: PubMed Central journal article supplement (PMC4991660)
Supplement: supp_dew172_dew172supp_table1.pdf [file supp_dew172_dew172supp_table1.pdf]

**Supplementary Table S1** Comparison of urinary paracetamol and *p*-aminophenol geometric means (95% CIs) by cohort covariates.

| Characteristic              | Female (n = 470)        |       |                         |         | Males (n = 439)         |      |                         |      |
|-----------------------------|-------------------------|-------|-------------------------|---------|-------------------------|------|-------------------------|------|
|                             | Paracetamol             |       | <i>p</i> -Aminophenol   |         | Paracetamol             |      | <i>p</i> -Aminophenol   |      |
|                             | Geometric Mean (95% CI) | P     | Geometric Mean (95% CI) | P       | Geometric Mean (95% CI) | P    | Geometric Mean (95% CI) | P    |
| Age                         |                         | 0.19  |                         | 0.32    |                         | 0.49 |                         | 0.22 |
| <30                         | 39.3 (27.0, 57.1)       |       | 630 (541, 733)          |         | 22.9 (13.7, 38.1)       |      | 800 (684, 935)          |      |
| 30–40                       | 74.1 (44.4, 124)        |       | 690 (592, 805)          |         | 34.7 (23.1, 52.2)       |      | 877 (781, 984)          |      |
| 40+                         | —                       |       | —                       |         | 35.3 (6.64, 187.6)      |      | 1128 (712, 1788)        |      |
| BMI (kg/m <sup>2</sup> )    |                         | 0.73  |                         | 0.01    |                         | 0.91 |                         | 0.31 |
| <25                         | 46.5 (29.2, 73.9)       |       | 597 (509, 701)          |         | 35.6 (18.0, 70.5)       |      | 738 (577, 944)          |      |
| 25–30                       | 57.9 (31.7, 106)        |       | 586 (473, 726)          |         | 25.8 (15.6, 42.7)       |      | 816 (706, 942)          |      |
| 30–35                       | 41.9 (19.0, 92.3)       |       | 783 (586, 1047)         |         | 33.1 (17.0, 64.3)       |      | 911 (772, 1076)         |      |
| >35                         | 90.2 (34.8, 234)        |       | 979 (745, 1286)         |         | 29.4 (14.0, 61.6)       |      | 1000 (798, 1253)        |      |
| Income                      |                         | 0.86  |                         | 0.01    |                         | 0.38 |                         | 0.33 |
| <\$70 000                   | 51.1 (29.7, 87.8)       |       | 822 (683, 989)          |         | 39.0 (21.2, 71.6)       |      | 894 (764, 1045)         |      |
| ≥\$70 000                   | 54.3 (36.8, 80.0)       |       | 597 (522, 682)          |         | 28.0 (19.5, 40.2)       |      | 847 (756, 948)          |      |
| Race, non-White             |                         | 0.02  |                         | 0.06    |                         | 0.28 |                         | 0.07 |
| No                          | 30.7 (15.9, 59.4)       |       | 534 (420, 679)          |         | 24.3 (12.1, 48.6)       |      | 694 (563, 856)          |      |
| Yes                         | 62.0 (43.4, 88.6)       |       | 696 (616, 785)          |         | 32.3 (22.7, 45.9)       |      | 911 (824, 1008)         |      |
| Smoking                     |                         | 0.04  |                         | <0.0001 |                         | 0.52 |                         | 0.19 |
| Passive                     | 44.7 (32.5, 61.5)       |       | 596 (531, 670)          |         | 26.1 (18.8, 36.3)       |      | 833 (749, 926)          |      |
| Active                      | 213.0 (64.4, 704)       |       | 1317 (1029, 1688)       |         | 42.7 (18.8, 97.0)       |      | 953 (794, 1144)         |      |
| Site                        |                         | 0.54  |                         | 0.49    |                         | 0.60 |                         | 0.07 |
| Michigan                    | 42.1 (19.4, 91.4)       |       | 733 (588, 913)          |         | 23.1 (10.9, 48.8)       |      | 1009 (864, 1179)        |      |
| Texas                       | 56.7 (40.3, 79.9)       |       | 641 (566, 725)          |         | 32.2 (22.9, 45.3)       |      | 825 (741, 917)          |      |
| Months off of contraception |                         | 0.68  |                         | 0.34    |                         | —    |                         | —    |
| 0                           | 52.1 (35.9, 75.7)       |       | 675 (591, 770)          |         | —                       |      | —                       |      |
| 1                           | 44.1 (18.6, 104)        |       | 686 (480, 980)          |         | —                       |      | —                       |      |
| 2                           | 66.0 (29.8, 146)        |       | 584 (474, 720)          |         | —                       |      | —                       |      |
| Site                        |                         | 0.54  |                         | 0.49    |                         | 0.60 |                         | 0.07 |
| Michigan                    | 42.1 (19.4, 91.4)       |       | 733 (588, 913)          |         | 23.1 (10.9, 48.8)       |      | 1009 (864, 1179)        |      |
| Texas                       | 56.7 (40.3, 79.9)       |       | 641 (566, 725)          |         | 32.2 (22.9, 45.3)       |      | 825 (741, 917)          |      |
| Hypothyroidism              |                         | 0.002 |                         | 0.46    |                         | 0.10 |                         | 0.07 |
| No                          | 46.23 (33.5, 63.7)      |       | 664 (594, 743)          |         | 30.57 (22.4, 41.8)      |      | 854 (779, 935)          |      |
| Yes                         | 309.0 (86.5, 1106)      |       | 591 (386, 904)          |         | 5.15 (1.32, 20.2)       |      | 1723 (960, 3094)        |      |
| Hypertension                |                         | 0.05  |                         | 0.5     |                         | 0.64 |                         | 0.91 |
| No                          | 49.92 (36.3, 58.6)      |       | 665 (596, 742)          |         | 29.82 (21.4, 41.5)      |      | 859 (780, 946)          |      |
| Yes                         | 252 (41.1, 158)         |       | 525 (276, 999)          |         | 32.73 (12.5, 85.4)      |      | 876 (675, 1136)         |      |

P-values were derived by Wilcoxon–Mann–Whitney or Kruskal–Wallis tests comparing geometric means of paracetamol and *p*-aminophenol by covariate categories.

Passive (cotinine < 10 ng/ml).

Active (cotinine ≥ 10 ng/ml).

BMI, body mass index.
