# Supplementary material
Source: PubMed Central journal article supplement (PMC4991660)
Supplement: supp_dew172_dew172supp_table2.pdf [file supp_dew172_dew172supp_table2.pdf]

**Supplementary Table SII Associations between non-imputed urinary paracetamol, *p*-aminophenol and TTP.**

|                                    | Partner-specific models |                                    |                                    | Couple-based models                  |                                    |                                    |
|------------------------------------|-------------------------|------------------------------------|------------------------------------|--------------------------------------|------------------------------------|------------------------------------|
|                                    | Unadjusted FOR (95% CI) | Adjusted <sup>a</sup> FOR (95% CI) | Adjusted <sup>b</sup> FOR (95% CI) | Unadjusted <sup>c</sup> FOR (95% CI) | Adjusted <sup>d</sup> FOR (95% CI) | Adjusted <sup>e</sup> FOR (95% CI) |
| Females                            |                         |                                    |                                    |                                      |                                    |                                    |
| Paracetamol <sup>f</sup>           | 0.99 (0.95, 1.03)       | 1.02 (0.98, 1.06)                  | 1.02 (0.98, 1.07)                  | 1.00 (0.96, 1.04)                    | 1.02 (0.97, 1.07)                  | 1.02 (0.98, 1.07)                  |
| Quartile 1                         | —                       | —                                  | —                                  | —                                    | —                                  | —                                  |
| Quartile 2                         | 1.19 (0.85, 1.65)       | 1.27 (0.88, 1.83)                  | 1.30 (0.90, 1.88)                  | 1.29 (0.91, 1.81)                    | 1.48 (0.99, 2.21)                  | 1.54 (1.03, 2.31)                  |
| Quartile 3                         | 1.17 (0.84, 1.65)       | 1.46 (1.00, 2.14)                  | 1.49 (1.02, 2.19)                  | 1.23 (0.86, 1.75)                    | 1.56 (1.02, 2.36)                  | 1.59 (1.04, 2.40)                  |
| Quartile 4                         | 1.03 (0.74, 1.45)       | 1.28 (0.87, 1.88)                  | 1.38 (0.93, 2.05)                  | 1.20 (0.84, 1.72)                    | 1.51 (0.98, 2.30)                  | 1.62 (1.05, 2.51)                  |
| <i>P</i> -trend                    | 0.89                    | 0.16                               | 0.08                               | 0.13                                 | 0.06                               | 0.04                               |
| <i>p</i> -aminophenol <sup>f</sup> | 0.95 (0.86, 1.04)       | 1.01 (0.90, 1.14)                  | 1.00 (0.89, 1.13)                  | 0.96 (0.87, 1.07)                    | 1.05 (0.92, 1.20)                  | 1.04 (0.91, 1.19)                  |
| Quartile 1                         | —                       | —                                  | —                                  | —                                    | —                                  | —                                  |
| Quartile 2                         | 1.21 (0.87, 1.68)       | 1.37 (0.94, 1.99)                  | 1.35 (0.92, 1.97)                  | 1.13 (0.80, 1.59)                    | 1.36 (0.90, 2.06)                  | 1.34 (0.88, 2.04)                  |
| Quartile 3                         | 1.36 (0.98, 1.88)       | 1.40 (0.95, 2.06)                  | 1.38 (0.94, 2.04)                  | 1.34 (0.95, 1.89)                    | 1.40 (0.93, 2.13)                  | 1.39 (0.91, 2.12)                  |
| Quartile 4                         | 0.76 (0.54, 1.07)       | 1.00 (0.66, 1.52)                  | 0.96 (0.63, 1.46)                  | 0.78 (0.54, 1.12)                    | 1.13 (0.72, 1.78)                  | 1.07 (0.68, 1.69)                  |
| <i>P</i> -trend                    | 0.21                    | 0.98                               | 0.87                               | 0.35                                 | 0.64                               | 0.78                               |
| Summary measure <sup>f</sup>       | 0.99 (0.95, 1.02)       | 1.02 (0.98, 1.06)                  | 1.02 (0.98, 1.06)                  | 0.99 (0.96, 1.03)                    | 1.02 (0.98, 1.06)                  | 1.02 (0.99, 1.07)                  |
| Quartile 1                         | —                       | —                                  | —                                  | —                                    | —                                  | —                                  |
| Quartile 2                         | 0.99 (0.71, 1.37)       | 1.22 (0.84, 1.78)                  | 1.25 (0.85, 1.82)                  | 0.94 (0.67, 1.34)                    | 1.16 (0.76, 1.76)                  | 1.13 (0.74, 1.73)                  |
| Quartile 3                         | 1.13 (0.81, 1.57)       | 1.39 (0.94, 2.05)                  | 1.39 (0.94, 2.06)                  | 1.21 (0.86, 1.70)                    | 1.59 (1.04, 2.42)                  | 1.60 (1.04, 2.45)                  |
| Quartile 4                         | 0.74 (0.52, 1.03)       | 0.98 (0.65, 1.48)                  | 1.00 (0.66, 1.51)                  | 0.77 (0.54, 1.10)                    | 1.00 (0.63, 1.58)                  | 0.98 (0.73, 1.64)                  |
| <i>P</i> -trend                    | 0.15                    | 0.96                               | 0.90                               | 0.35                                 | 0.72                               | 0.69                               |
| Males                              |                         |                                    |                                    |                                      |                                    |                                    |
| Paracetamol <sup>c</sup>           | 0.96 (0.92, 1.00)       | 0.95 (0.90, 0.99)                  | 0.94 (0.90, 0.99)                  | 0.95 (0.91, 1.00)                    | 0.94 (0.89, 0.99)                  | 0.94 (0.89, 0.99)                  |
| Quartile 1                         | —                       | —                                  | —                                  | —                                    | —                                  | —                                  |
| Quartile 2                         | 0.85 (0.61, 1.20)       | 0.87 (0.60, 1.26)                  | 0.86 (0.59, 1.24)                  | 0.81 (0.57, 1.14)                    | 0.91 (0.61, 1.36)                  | 0.91 (0.61, 1.37)                  |
| Quartile 3                         | 0.98 (0.70, 1.38)       | 0.91 (0.62, 1.34)                  | 0.93 (0.63, 1.36)                  | 0.93 (0.65, 1.32)                    | 0.92 (0.61, 1.39)                  | 0.93 (0.62, 1.42)                  |
| Quartile 4                         | 0.69 (0.48, 0.97)       | 0.69 (0.47, 1.02)                  | 0.68 (0.46, 1.00)                  | 0.64 (0.44, 0.92)                    | 0.63 (0.41, 0.97)                  | 0.63 (0.41, 0.97)                  |
| <i>P</i> -trend                    | 0.08                    | 0.09                               | 0.08                               | 0.04                                 | 0.03                               | 0.03                               |
| <i>p</i> -aminophenol <sup>c</sup> | 0.92 (0.81, 1.03)       | 0.91 (0.78, 1.05)                  | 0.91 (0.79, 1.06)                  | 0.93 (0.82, 1.05)                    | 0.91 (0.77, 1.07)                  | 0.91 (0.78, 1.07)                  |
| Quartile 1                         | —                       | —                                  | —                                  | —                                    | —                                  | —                                  |
| Quartile 2                         | 0.90 (0.64, 1.28)       | 0.97 (0.66, 1.43)                  | 0.97 (0.66, 1.43)                  | 0.90 (0.61, 1.28)                    | 0.94 (0.62, 1.41)                  | 0.96 (0.63, 1.46)                  |
| Quartile 3                         | 0.99 (0.70, 1.39)       | 1.20 (0.81, 1.79)                  | 1.21 (0.81, 1.80)                  | 1.01 (0.72, 1.45)                    | 1.18 (0.77, 1.81)                  | 1.18 (0.76, 1.81)                  |
| Quartile 4                         | 0.84 (0.60, 1.18)       | 0.76 (0.51, 1.14)                  | 0.79 (0.53, 1.18)                  | 0.89 (0.62, 1.27)                    | 0.81 (0.52, 1.26)                  | 0.84 (0.54, 1.31)                  |
| <i>P</i> -trend                    | 0.42                    | 0.27                               | 0.35                               | 0.7                                  | 0.52                               | 0.61                               |
| Summary measure <sup>f,g</sup>     |                         |                                    |                                    |                                      |                                    |                                    |
| Quartile 1                         | 0.95 (0.92, 0.99)       | 0.94 (0.90, 0.98)                  | 0.94 (0.90, 0.98)                  | 0.95 (0.92, 0.99)                    | 0.94 (0.89, 0.98)                  | 0.94 (0.89, 0.98)                  |
| Quartile 2                         | —                       | —                                  | —                                  | —                                    | —                                  | —                                  |
| Quartile 3                         | 1.11 (0.79, 1.56)       | 1.15 (0.79, 1.67)                  | 1.14 (0.78, 1.67)                  | 1.10 (0.78, 1.55)                    | 1.11 (0.75, 1.66)                  | 1.10 (0.73, 1.64)                  |
| Quartile 4                         | 1.12 (0.79, 1.58)       | 1.27 (0.85, 1.89)                  | 1.31 (0.87, 1.96)                  | 1.19 (0.84, 1.69)                    | 1.33 (0.87, 2.02)                  | 1.35 (0.88, 2.07)                  |
| Quartile 1                         | 0.74 (0.52, 1.05)       | 0.66 (0.43, 0.99)                  | 0.66 (0.44, 1.01)                  | 0.75 (0.53, 1.08)                    | 0.66 (0.42, 1.02)                  | 0.67 (0.43, 1.05)                  |
| <i>P</i> -trend                    | 0.10                    | 0.05*                              | 0.06                               | 0.18                                 | 0.09                               | 0.14                               |

*P*-trend from Wald test for nonlinearity; \**P*-value <0.05 prior to rounding.

<sup>a</sup>Models were adjusted for age, BMI, creatinine, smoking status (cotinine dichotomized at a threshold of 10 ng/ml), race/ethnicity (dichotomized, non-White versus White) and income (dichotomized at \$70 000).

<sup>b</sup>Models included covariates in model a and hypertension and hypothyroidism.

<sup>c</sup>Models included concentration for paracetamol or *p*-aminophenol and partner's concentration as well.

<sup>d</sup>Models were adjusted for female age, female and male age difference, female and male BMI, creatinine, smoking status (cotinine dichotomized at a threshold of 10 ng/ml), race/ethnicity (dichotomized, non-White versus White) and income (dichotomized at \$70 000).

<sup>e</sup>Models were adjusted for covariates listed in model C along with female and male hypertension and hypothyroid.

<sup>f</sup>Modeled as continuous variable.

<sup>g</sup>Summary measure of urinary paracetamol and metabolite *p*-aminophenol.
